# Supplementary material
Source: PubMed Central journal article supplement (PMC7441582)
Supplement: NIHMS1523560-supplement-1.pdf [file NIHMS1523560-supplement-1.pdf]

# Supplementary tables and figures for “Asymptotic properties of Principal Component Analysis and shrinkage-bias adjustment under the Generalized Spiked Population model”

Rounak Dey<sup>a</sup>, Seunggeun Lee<sup>a,\*</sup>

<sup>a</sup>*Department of Biostatistics, University of Michigan School of Public Health, 1415 Washington Heights, Ann Arbor, MI 48109-2029, USA*

---

---

Some additional tables and figures that were referred to in “Asymptotic properties of Principal Component Analysis and shrinkage-bias adjustment under the Generalized Spiked Population model” are provided in this Online Supplement.

Table 1: Number of simulated datasets (out of 200) where the number of distant spikes were estimated to be 1, 2, 3 or  $\geq 4$

| <b>Settings</b> |     |      |            |        | <b>Estimated no. of distant spikes</b> |     |    |          |
|-----------------|-----|------|------------|--------|----------------------------------------|-----|----|----------|
| <b>No.</b>      | $n$ | $p$  | $\sigma^2$ | $\rho$ | 1                                      | 2   | 3  | $\geq 4$ |
| 1               | 500 | 5000 | 4          | 0.8    | 0                                      | 77  | 77 | 46       |
| 2               | 500 | 5000 | 1          | 0.7    | 0                                      | 139 | 53 | 8        |
| 3               | 500 | 5000 | 7.5        | 0.8    | 95                                     | 78  | 20 | 7        |
| 4               | 500 | 5000 | 4          | 0      | 0                                      | 188 | 12 | 0        |

---

\*Corresponding author. Email address: leeshawn@umich.edu

Figure 1: Empirical biases (%) in estimating the shrinkage factor corresponding to the largest population eigenvalue for GSP-based and UHD-based methods. The population eigenvalues and the rate of increment of the largest population eigenvalue are assumed to be unknown.

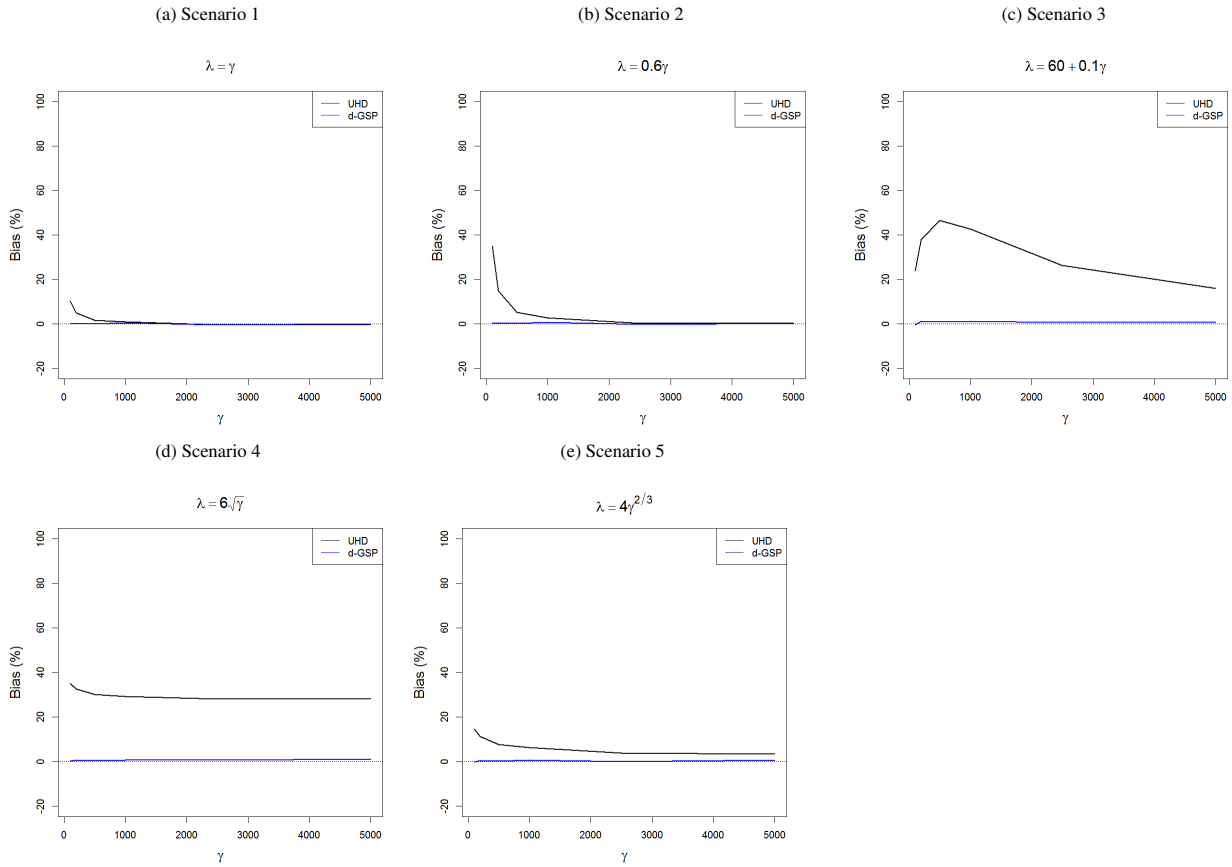

Figure 2: Linkage disequilibrium

Hapmap III CEU+TSI samples, 848 SNPs on Chr. 9, created using Haploview [1]

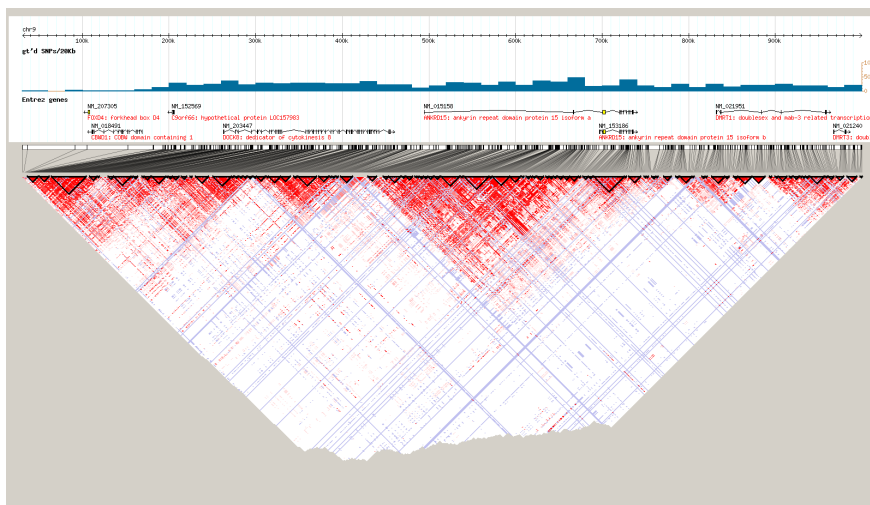

Figure 3: Sample sizes of the test samples that were included in the prediction error estimation for different values of the thresholding parameter  $\epsilon$

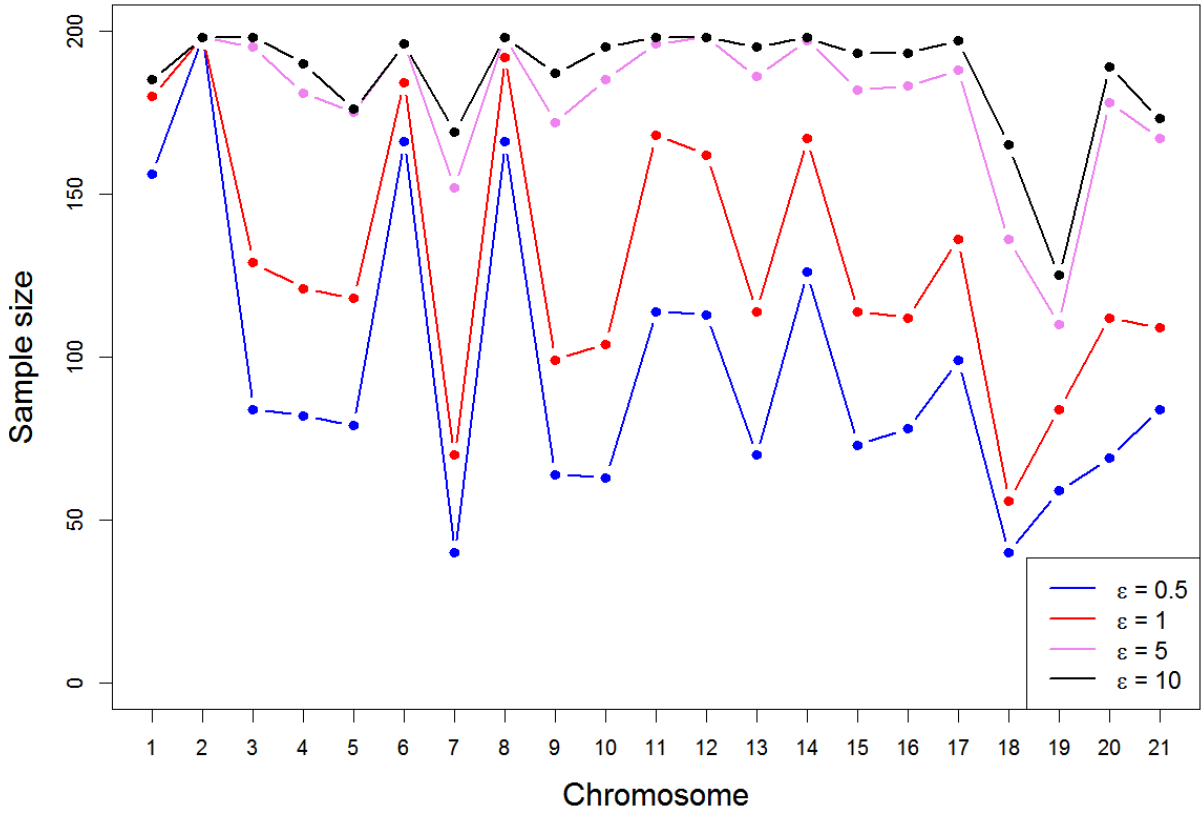

Figure 4: Distribution of the number of markers across different chromosomes

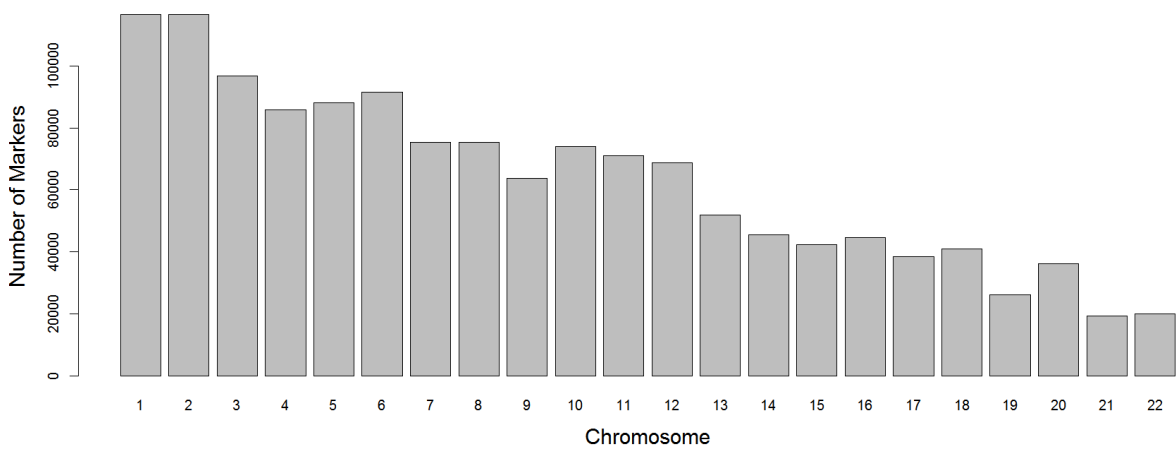

Figure 5: Comparison of the mean squared errors (MSE) of the unadjusted and adjusted PC scores based on the  $d$ -GSP and SP methods with the adjusted PC scores based on the  $\lambda$ -GSP method. The ratios of the MSEs are presented for chromosome 1-21 using different values of the thresholding parameter  $\epsilon$ . The y-axis is presented in a logarithmic scale.

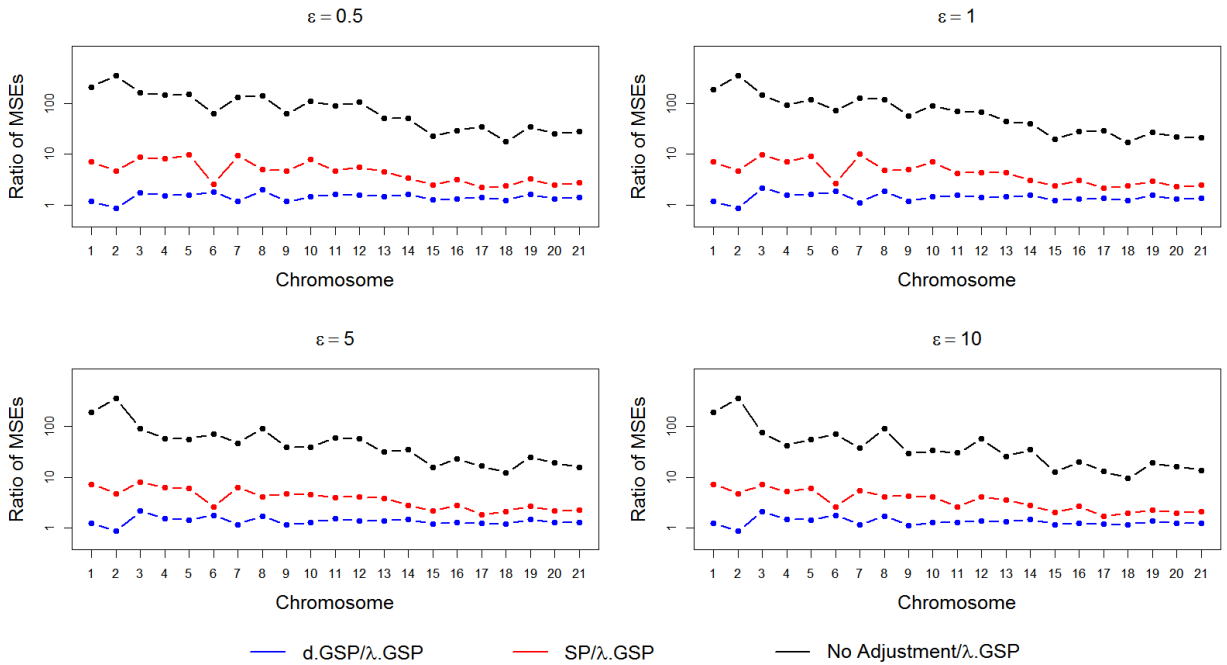

## References

- [1] J. C. Barrett, B. Fry, J. Maller, M. J. Daly, Haploview: analysis and visualization of Id and haplotype maps, *Bioinformatics* 21 (2005) 263–265.
